# Supplementary material for: Multilevel Analysis of the Nutritional and Health Status among Children and Adolescents in Eastern China
Source: MDPI journal article supplement (doi:10.3390/nu14040758), 2022-02-11
Supplement: s1 [file s1]

Supplementary Materials:

**Table S1.** Prevalence of various nutritional status in Jiangsu Province children and adolescents aged 7-12 years and 13-17 years.

| Nutritional status      | 7-12 years group |                 |                |                    |           | 13-17 years group |                 |                |                    |            | $\chi^2$ values<br>(between<br>age groups) | $p$ values<br>(between<br>age groups) |
|-------------------------|------------------|-----------------|----------------|--------------------|-----------|-------------------|-----------------|----------------|--------------------|------------|--------------------------------------------|---------------------------------------|
|                         | Males N<br>(%)   | Female<br>N (%) | Total N<br>(%) | $\chi^2$<br>values | $p$ value | Males N<br>(%)    | Female<br>N (%) | Total N<br>(%) | $\chi^2$<br>values | $p$ values |                                            |                                       |
| Weight groups           |                  |                 |                | 66.997             | <0.001    |                   |                 |                | 56.647             | <0.001     | 17.904                                     | <0.001                                |
| Wasting                 | 61(6.2)          | 60(6.1)         | 121(6.1)       |                    |           | 35(6.6)           | 10(1.9)         | 45(4.3)        |                    |            |                                            |                                       |
| Normal weight           | 569(57.5)        | 730(73.9)       | 1299(65.7)     |                    |           | 324(61.1)         | 406(78.5)       | 730(69.7)      |                    |            |                                            |                                       |
| Over weight             | 179(18.1)        | 99(10.0)        | 278(14.1)      |                    |           | 92(17.4)          | 77(14.9)        | 169(16.1)      |                    |            |                                            |                                       |
| Obesity                 | 181(18.3)        | 99(10.0)        | 280(14.2)      |                    |           | 79(14.9)          | 24(4.6)         | 103(9.8)       |                    |            |                                            |                                       |
| Metabolic syndrome      |                  |                 |                | 0.014              | 0.907     |                   |                 |                | 16.724             | <0.001     | 2.096                                      | 0.148                                 |
| No                      | 944(95.4)        | 941(95.2)       | 1885(95.3)     |                    |           | 483(91.1)         | 502(97.1)       | 985(94.1)      |                    |            |                                            |                                       |
| Yes                     | 46(4.6)          | 47(4.8)         | 93(4.7)        |                    |           | 47(8.9)           | 15(2.9)         | 62(5.9)        |                    |            |                                            |                                       |
| Abdominal obesity       |                  |                 |                | 5.675              | 0.017     |                   |                 |                | 17.242             | <0.001     | 9.170                                      | 0.002                                 |
| No                      | 768(77.6)        | 809(81.9)       | 1577(79.7)     |                    |           | 422(79.6)         | 460(89.0)       | 882(84.2)      |                    |            |                                            |                                       |
| Yes                     | 222(22.4)        | 179(18.1)       | 401(20.3)      |                    |           | 108(20.4)         | 57(11.0)        | 165(15.8)      |                    |            |                                            |                                       |
| High TG                 |                  |                 |                | 2.090              | 0.148     |                   |                 |                | 0.010              | 0.921      | 4.685                                      | 0.030                                 |
| No                      | 863(87.2)        | 839(84.9)       | 1702(86.0)     |                    |           | 441(83.2)         | 429(83.0)       | 870(83.1)      |                    |            |                                            |                                       |
| Yes                     | 127(12.8)        | 149(15.1)       | 276(14.0)      |                    |           | 89(16.8)          | 88(17.0)        | 177(16.9)      |                    |            |                                            |                                       |
| Low HDL                 |                  |                 |                | 0.064              | 0.801     |                   |                 |                | 8.884              | 0.003      | 4.563                                      | 0.033                                 |
| No                      | 956(96.6)        | 952(96.4)       | 1908(96.4)     |                    |           | 492(92.8)         | 501(96.9)       | 993(94.8)      |                    |            |                                            |                                       |
| Yes                     | 34(3.4)          | 36(3.6)         | 70(3.5)        |                    |           | 34(3.4)           | 16(3.4)         | 54(5.2)        |                    |            |                                            |                                       |
| Elevated blood pressure |                  |                 |                | 0.162              | 0.688     |                   |                 |                | 1.737              | 0.188      | 22.641                                     | <0.001                                |
| No                      | 555(56.1)        | 545(55.2)       | 1100(56.5)     |                    |           | 332(62.6)         | 344(66.5)       | 676(64.6)      |                    |            |                                            |                                       |
| Yes                     | 435(43.9)        | 443(44.8)       | 878(44.4)      |                    |           | 198(37.4)         | 173(33.5)       | 371(35.4)      |                    |            |                                            |                                       |
| Elevated FBG            |                  |                 |                | 8.722              | 0.003     |                   |                 |                | 7.266              | 0.007      | 0.165                                      | 0.684                                 |
| No                      | 944(95.4)        | 966(97.8)       | 1910(96.6)     |                    |           | 502(94.7)         | 506(97.9)       | 1008(96.3)     |                    |            |                                            |                                       |
| Yes                     | 46(4.6)          | 22(2.2)         | 68(3.4)        |                    |           | 28(5.3)           | 11(2.1)         | 39(3.7)        |                    |            |                                            |                                       |
| Hyperuricemia           |                  |                 |                | 29.517             | <0.001    |                   |                 |                | 245.458            | <0.001     | 337.742                                    | <0.001                                |
| No                      | 761(76.9)        | 853(86.3)       | 1614(81.6)     |                    |           | 136(25.7)         | 383(74.1)       | 519(49.6)      |                    |            |                                            |                                       |
| Yes                     | 229(23.1)        | 135(13.7)       | 364(18.4)      |                    |           | 394(74.3)         | 134(25.9)       | 528(50.4)      |                    |            |                                            |                                       |
| High LDL                |                  |                 |                | 0.508              | 0.476     |                   |                 |                | 0.006              | 0.936      | 3.321                                      | 0.068                                 |
| No                      | 941(95.1)        | 932(94.3)       | 1873(94.7)     |                    |           | 510(96.2)         | 497(96.1)       | 1007(96.2)     |                    |            |                                            |                                       |
| Yes                     | 49(4.9)          | 56(5.7)         | 105(5.3)       |                    |           | 20(3.8)           | 20(3.9)         | 40(3.8)        |                    |            |                                            |                                       |
| High TC                 |                  |                 |                | 1.817              | 0.178     |                   |                 |                | 8.832              | 0.003      | 1.671                                      | 0.196                                 |

|                 |           |           |            |        |        |           |           |            |        |        |         |        |
|-----------------|-----------|-----------|------------|--------|--------|-----------|-----------|------------|--------|--------|---------|--------|
| No              | 920(92.9) | 902(91.3) | 1822(92.1) |        |        | 507(95.7) | 471(91.1) | 978(93.4)  |        |        |         |        |
| Yes             | 70(7.1)   | 86(8.7)   | 156(7.9)   |        |        | 23(4.3)   | 46(8.9)   | 69(6.6)    |        |        |         |        |
| Vitamin A       |           |           |            | 2.231  | 0.328  |           |           |            | 8.052  | 0.018  | 73.328  | <0.001 |
| Sufficiency     | 784(79.2) | 807(81.7) | 1591(80.4) |        |        | 501(94.5) | 465(89.9) | 966(92.3)  |        |        |         |        |
| Inadequacy      | 195(19.7) | 169(17.1) | 364(18.4)  |        |        | 27(5.1)   | 50(9.7)   | 77(7.4)    |        |        |         |        |
| Deficiency      | 11(1.1)   | 12(1.2)   | 23(1.2)    |        |        | 2(0.4)    | 2(0.4)    | 4(0.4)     |        |        |         |        |
| Vitamin D       |           |           |            | 40.895 | <0.001 |           |           |            | 36.696 | <0.001 | 179.663 | <0.001 |
| Sufficiency     | 304(30.7) | 205(20.7) | 509(25.7)  |        |        | 79(14.9)  | 28(5.4)   | 107(10.2)  |        |        |         |        |
| Inadequacy      | 547(55.3) | 555(56.2) | 1102(55.7) |        |        | 288(54.3) | 260(50.3) | 548(52.3)  |        |        |         |        |
| Deficiency      | 139(14.0) | 228(23.1) | 367(18.6)  |        |        | 163(30.8) | 229(44.3) | 392(37.4)  |        |        |         |        |
| Anemia          |           |           |            | 5.377  | 0.020  |           |           |            | 33.232 | <0.001 | 10.396  | 0.001  |
| No              | 964(97.8) | 947(95.9) | 1911(96.9) |        |        | 521(98.5) | 467(90.3) | 988(84.5)  |        |        |         |        |
| Yes             | 22(2.2)   | 40(4.1)   | 62(3.1)    |        |        | 8(1.5)    | 50(9.7)   | 58(5.5)    |        |        |         |        |
| Zinc deficiency |           |           |            | 0.536  | 0.464  |           |           |            | 4.828  | 0.028  | 0.561   | 0.454  |
| No              | 944(95.4) | 935(94.6) | 1879(95.0) |        |        | 514(97.0) | 487(94.2) | 1001(95.6) |        |        |         |        |
| Yes             | 46(4.6)   | 53(5.4)   | 99(5.0)    |        |        | 16(3.0)   | 30(5.8)   | 46(4.4)    |        |        |         |        |

high TG = high triglyceride; low HDL = low high-density lipoprotein; elevated FBG = elevated fasting blood glucose; high LDL = high low-density lipoprotein; high TC = high total cholesterol.
